# Supplementary material for: Serum Magnesium Is Associated with Long-Term Survival of Non-ST-Elevation Myocardial Infarction Patients
Source: MDPI journal article supplement (doi:10.3390/nu15194299), 2023-10-09

Supplementary Figure S1. Serum magnesium levels by kidney function.

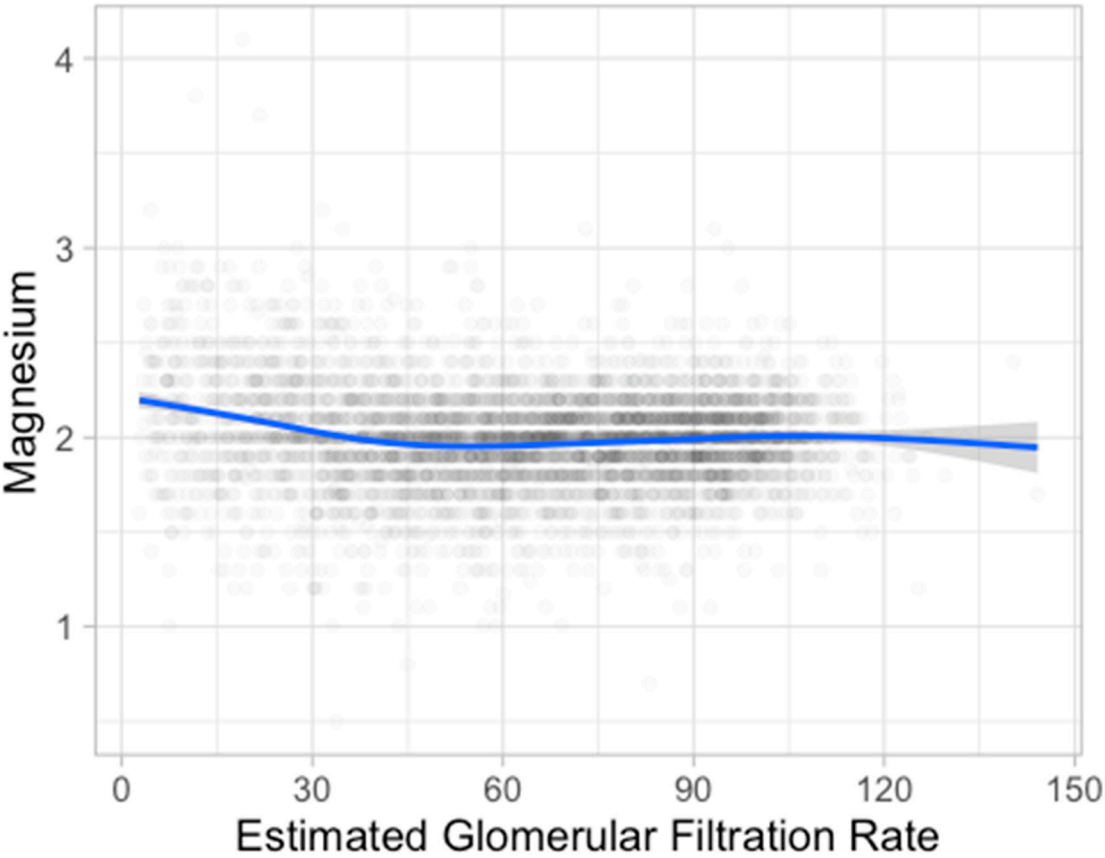

Supplementary Figure S2. Serum magnesium levels histogram

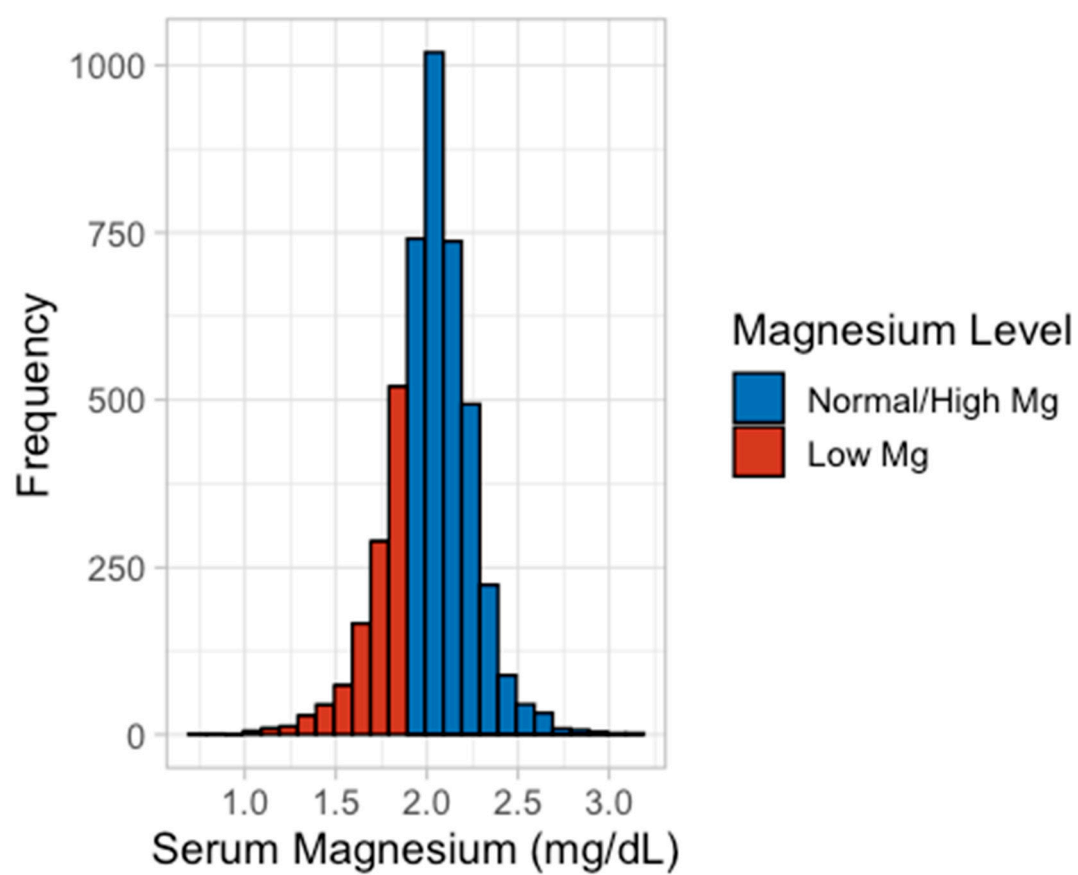

Supplement: s1 [file s1]
